# Supplementary material
Source: PubMed Central journal article supplement (PMC3460432)

**Figure S1**

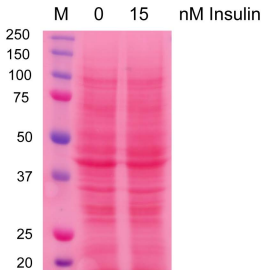

Figure S3

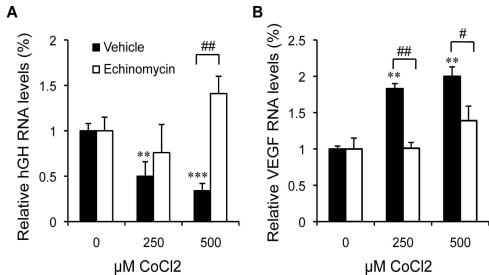

Supplement: supp_M112.380949_1.pdf [file supp_M112.380949_1.pdf]
